# Supplementary material for: Modulation of the honey bee queen microbiota: Effects of early social contact
Source: PLoS One. 2018 Jul 12;13(7):e0200527. doi: 10.1371/journal.pone.0200527 (PMC6042773; doi:10.1371/journal.pone.0200527)
Supplement: S2 Table — (CSV) [file pone.0200527.s004.csv]

S2 Table: Sample specific information
Sample Number	Name	colony	State	mate_state	U16S_qPCR	Log10qPCR	Shannon	Effective Number of Species	Age	Description
1	C2_IMQ2E	2	isolated	mated	240800	5.381656483	0.261880579	1.299371361	14	isolated
2	C1_IMQ_1	1	isolated	mated	6915000	6.839792184	0.393272594	1.48182227	14	isolated
3	C2_IMQ4C	2	isolated	mated	16289000	7.211894423	1.515237208	4.550500414	14	isolated
4	C2_IMQ2F	2	isolated	mated	5985000	6.777064155	1.398077324	4.047410622	14	isolated
5	C2_IMQ2D	2	isolated	mated	15734000	7.196839146	0.941672369	2.564266234	14	isolated
6	C2_IMQ_1	2	isolated	mated	58296000	7.765638757	2.544281283	12.7340726	14	isolated
7	C1_IMQ2H	1	isolated	mated	16104000	7.206933762	0.944448339	2.571394449	14	isolated
8	C1_IMQ2G	1	isolated	mated	20764000	7.31731102	0.740410686	2.096796463	14	isolated
9	C1_IMQ4D	1	isolated	mated	10685000	7.028774527	1.908934269	6.745895656	14	isolated
10	C1_NIMQ2B	1	not_isolated	mated	976100	5.989494313	0.275368285	1.317015623	14	not_isolated
11	C2_NIMQ2J	2	not_isolated	mated	829500	5.91881639	0.45947328	1.583239841	14	not_isolated
12	C1_NIMQ2A	1	not_isolated	mated	8298000	6.91897343	1.020876585	2.775626771	14	not_isolated
13	C1_NIMQ4A	1	not_isolated	mated	651000	5.813580989	0.34393339	1.41048468	14	not_isolated
14	C2_NIMQ2C	2	not_isolated	mated	1258600	6.099887727	0.574999592	1.777129802	14	not_isolated
15	C1_NIMQA	1	not_isolated	mated	2377000	6.376029182	0.451251195	1.570275678	14	not_isolated
16	C2_NIMQ2I	2	not_isolated	mated	2738000	6.437433444	0.566036529	1.761272447	14	not_isolated
17	C1_NIMQB	1	not_isolated	mated	526770	5.721621034	0.304103376	1.355409166	14	not_isolated
18	C2_IVQ3H	2	isolated	virgin	50025000	7.699187097	1.028502445	2.796874224	4	isolated
19	C1_IVQ3D	1	isolated	virgin	6554000	6.816506437	1.788090061	5.978023895	4	isolated
20	C2_IVQ_3	2	isolated	virgin	8284000	6.91824009	1.877088979	6.534455212	4	isolated
21	C1_IVQ3F	1	isolated	virgin	45953000	7.662313869	1.482076016	4.402074979	4	isolated
22	C2_IVQ3I	2	isolated	virgin	19162000	7.282440836	1.964625759	7.132242913	4	isolated
23	C2_NIVQ_4	2	not_isolated	virgin	6356000	6.803183889	1.054727415	2.871192403	4	not_isolated
24	C1_NIVQ3C	1	not_isolated	virgin	1928600	6.285242162	2.295258996	9.927006734	4	not_isolated
25	C2_NIVQ_1	2	not_isolated	virgin	4657000	6.668106238	1.637440503	5.141991743	4	not_isolated
26	C1_NIVQ_2	1	not_isolated	virgin	3032300	6.481772166	0.922311932	2.51509841	4	not_isolated
27	C2_NIVQ_5	2	not_isolated	virgin	14543000	7.162654004	0.470730597	1.601163571	4	not_isolated
28	C2_NIVQ3K	2	not_isolated	virgin	17183000	7.23509899	1.358236459	3.88932826	4	not_isolated
29	C1_W43B_1	1	worker	worker	30568000	7.485267025	1.853081123	6.379445128	4	worker
30	C1_W43B_2	1	worker	worker	36166000	7.558300478	2.744688604	15.55976793	4	worker
31	C1_W43B_3	1	worker	worker	25861000	7.412645314	1.520423794	4.574163287	4	worker
32	C1_W43B_4	1	worker	worker	35622000	7.551718299	2.20734298	9.091527901	4	worker
33	C1_W43B_5	1	worker	worker	60037000	7.778418983	2.763817763	15.86027829	4	worker
34	C2_W43J_4	2	worker	worker	32985000	7.518316488	2.85665799	17.40326774	4	worker
35	C2_W43J_1	2	worker	worker	26100000	7.416640507	2.732540579	15.37189096	4	worker
36	C2_W43J_2	2	worker	worker	22200000	7.346352974	2.600976175	13.47688742	4	worker
37	C2_W43J_3	2	worker	worker	54160000	7.733678656	2.734002866	15.39438552	4	worker
38	C2_W43J_5	2	worker	worker	107000000	8.029383778	2.137741341	8.480261961	4	worker
39	C1_W142A_2	1	worker	worker	25079000	7.399310215	3.354932722	28.64367704	14	worker
40	C1_W142B_5	1	worker	worker	87321000	7.941118701	3.310137782	27.38889891	14	worker
41	C1_W142A_3	1	worker	worker	123000000	8.089905111	3.193567832	24.37523924	14	worker
42	C1_W142A_4	1	worker	worker	73442000	7.865944495	2.708197938	15.00221622	14	worker
43	C1_W142A_5	1	worker	worker	20568000	7.313192064	3.389139881	29.64044699	14	worker
44	C1_W142B_1	1	worker	worker	14455000	7.160018096	2.439688424	11.46946658	14	worker
45	C1_W142B_2	1	worker	worker	40928000	7.612020523	3.250964447	25.81522533	14	worker
46	C1_W142B_3	1	worker	worker	68163000	7.833548696	2.878849395	17.79378778	14	worker
47	C1_W142A_1	1	worker	worker	65731000	7.817770239	3.172624715	23.8700543	14	worker
48	C1_W142B_4	1	worker	worker	269000000	8.42975228	2.971127707	19.51391317	14	worker
